# Supplementary material
Source: PubMed Central journal article supplement (PMC4050544)
Supplement: 1406468111_pnas.1406468111.sapp.pdf [file 1406468111_pnas.1406468111.sapp.pdf]

**Supplementary Table 1** Names recovered at all taxonomic levels (phylum, order, family, genus, species) by each gene region with Sanger sequencing of individuals as well as NGS of mixed tissue. Sequence assignments were generated through a BLASTn similarity search against the GenBank public database followed by lowest common ancestor parsing of results.

| Prokaryotes    |                   |                      |                          |                        | Sanger | NGS |       |       |       |     |
|----------------|-------------------|----------------------|--------------------------|------------------------|--------|-----|-------|-------|-------|-----|
| Phylum         | Order             | Family               | Genus                    | Species                | COI    | COI | 16Sv3 | 16Sv4 | 16Sv6 | 18S |
| Acidobacteria  |                   |                      |                          |                        |        |     |       |       |       |     |
|                | Acidobacteriales  |                      |                          |                        |        |     |       |       |       |     |
|                |                   | Acidobacteriaceae    |                          |                        |        |     |       |       |       |     |
| Actinobacteria |                   |                      |                          |                        |        |     |       |       |       |     |
|                | Actinomycetales   |                      |                          |                        |        |     |       |       |       |     |
|                |                   | Actinomycetaceae     |                          |                        |        |     |       |       |       |     |
|                |                   |                      | <i>Actinomyces</i>       |                        |        |     |       |       |       |     |
|                |                   | Corynebacteriaceae   |                          |                        |        |     |       |       |       |     |
|                |                   |                      | <i>Corynebacterium</i>   |                        |        |     |       |       |       |     |
|                |                   |                      |                          | <i>C. singulare</i>    |        |     |       |       |       |     |
|                |                   | Microbacteriaceae    |                          |                        |        |     |       |       |       |     |
|                |                   | Micrococcaceae       |                          |                        |        |     |       |       |       |     |
|                |                   | Mycobacteriaceae     |                          |                        |        |     |       |       |       |     |
|                |                   |                      | <i>Mycobacterium</i>     |                        |        |     |       |       |       |     |
|                |                   | Nocardiaceae         |                          |                        |        |     |       |       |       |     |
|                |                   |                      | <i>Nocardia</i>          |                        |        |     |       |       |       |     |
|                |                   | Nocardioidaceae      |                          |                        |        |     |       |       |       |     |
|                |                   | Propionibacteriaceae |                          |                        |        |     |       |       |       |     |
|                |                   |                      | <i>Propionibacterium</i> |                        |        |     |       |       |       |     |
|                |                   | Pseudonocardiaceae   |                          |                        |        |     |       |       |       |     |
|                |                   |                      | <i>Pseudonocardia</i>    |                        |        |     |       |       |       |     |
|                |                   | Streptomycetaceae    |                          |                        |        |     |       |       |       |     |
|                |                   |                      | <i>Streptomyces</i>      |                        |        |     |       |       |       |     |
|                | Bifidobacteriales |                      |                          |                        |        |     |       |       |       |     |
|                |                   | Bifidobacteriaceae   |                          |                        |        |     |       |       |       |     |
|                |                   |                      | <i>Bifidobacterium</i>   |                        |        |     |       |       |       |     |
|                | Coriobacteriales  |                      |                          |                        |        |     |       |       |       |     |
|                |                   | Coriobacteriaceae    |                          |                        |        |     |       |       |       |     |
|                |                   |                      | <i>Collinsella</i>       |                        |        |     |       |       |       |     |
|                |                   |                      |                          | <i>C. aerofaciens</i>  |        |     |       |       |       |     |
| Bacteroidetes  |                   |                      |                          |                        |        |     |       |       |       |     |
|                | Bacteroidales     |                      |                          |                        |        |     |       |       |       |     |
|                |                   | Bacteroidaceae       |                          |                        |        |     |       |       |       |     |
|                |                   |                      | <i>Bacteroides</i>       |                        |        |     |       |       |       |     |
|                |                   |                      |                          | <i>B. acidifaciens</i> |        |     |       |       |       |     |
|                |                   |                      |                          | <i>B. ovatus</i>       |        |     |       |       |       |     |





|                            |  |  |  |  |  |
|----------------------------|--|--|--|--|--|
| Planctomycetales           |  |  |  |  |  |
| Planctomycetaceae          |  |  |  |  |  |
| Proteobacteria             |  |  |  |  |  |
| Aeromonadales              |  |  |  |  |  |
| Aeromonadaceae             |  |  |  |  |  |
| <i>Aeromonas</i>           |  |  |  |  |  |
| Burkholderiales            |  |  |  |  |  |
| Alcaligenaceae             |  |  |  |  |  |
| Burkholderiaceae           |  |  |  |  |  |
| <i>Burkholderia</i>        |  |  |  |  |  |
| Comamonadaceae             |  |  |  |  |  |
| Campylobacterales          |  |  |  |  |  |
| Campylobacteraceae         |  |  |  |  |  |
| <i>Campylobacter</i>       |  |  |  |  |  |
| Chromatiales               |  |  |  |  |  |
| Chromatiaceae              |  |  |  |  |  |
| Desulfobacterales          |  |  |  |  |  |
| Desulfobacteraceae         |  |  |  |  |  |
| Desulfovibrionales         |  |  |  |  |  |
| Desulfovibrionaceae        |  |  |  |  |  |
| <i>Desulfovibrio</i>       |  |  |  |  |  |
| Enterobacteriales          |  |  |  |  |  |
| Enterobacteriaceae         |  |  |  |  |  |
| <i>Cronobacter</i>         |  |  |  |  |  |
| <i>Enterobacter</i>        |  |  |  |  |  |
| <i>E. cloacae</i>          |  |  |  |  |  |
| <i>Klebsiella</i>          |  |  |  |  |  |
| <i>K. oxytoca</i>          |  |  |  |  |  |
| <i>Pantoea</i>             |  |  |  |  |  |
| <i>P. stewartii</i>        |  |  |  |  |  |
| <i>Proteus</i>             |  |  |  |  |  |
| <i>Providencia</i>         |  |  |  |  |  |
| Legionellales              |  |  |  |  |  |
| Coxiellaceae               |  |  |  |  |  |
| Myxococcales               |  |  |  |  |  |
| Neisseriales               |  |  |  |  |  |
| Neisseriaceae              |  |  |  |  |  |
| <i>Aquaspirillum</i>       |  |  |  |  |  |
| <i>A. putridiconchylum</i> |  |  |  |  |  |
| <i>Kingella</i>            |  |  |  |  |  |
| <i>K. oralis</i>           |  |  |  |  |  |
| <i>Neisseria</i>           |  |  |  |  |  |
| <i>N. cinerea</i>          |  |  |  |  |  |

|                         |                       |  |  |  |  |  |  |
|-------------------------|-----------------------|--|--|--|--|--|--|
|                         | <i>N. shayeganii</i>  |  |  |  |  |  |  |
|                         | <i>Stenoxybacter</i>  |  |  |  |  |  |  |
|                         | <i>S. acetivorans</i> |  |  |  |  |  |  |
|                         | <i>Vitreoscilla</i>   |  |  |  |  |  |  |
|                         | <i>V. stercoraria</i> |  |  |  |  |  |  |
| Oceanospirillales       |                       |  |  |  |  |  |  |
| Halomonadaceae          |                       |  |  |  |  |  |  |
| <i>Carnimonas</i>       |                       |  |  |  |  |  |  |
| <i>C. nigrificans</i>   |                       |  |  |  |  |  |  |
| <i>Zymbacter</i>        |                       |  |  |  |  |  |  |
| <i>Z. palmae</i>        |                       |  |  |  |  |  |  |
| Oceanospirillaceae      |                       |  |  |  |  |  |  |
| Pasteurellales          |                       |  |  |  |  |  |  |
| Pasteurellaceae         |                       |  |  |  |  |  |  |
| Pseudomonadales         |                       |  |  |  |  |  |  |
| Moraxellaceae           |                       |  |  |  |  |  |  |
| <i>Acinetobacter</i>    |                       |  |  |  |  |  |  |
| Pseudomonadaceae        |                       |  |  |  |  |  |  |
| <i>Pseudomonas</i>      |                       |  |  |  |  |  |  |
| Rhizobiales             |                       |  |  |  |  |  |  |
| Bartonellaceae          |                       |  |  |  |  |  |  |
| <i>Bartonella</i>       |                       |  |  |  |  |  |  |
| Brucellaceae            |                       |  |  |  |  |  |  |
| Methylobacteriaceae     |                       |  |  |  |  |  |  |
| <i>Methylobacterium</i> |                       |  |  |  |  |  |  |
| Phyllobacteriaceae      |                       |  |  |  |  |  |  |
| <i>Mesorhizobium</i>    |                       |  |  |  |  |  |  |
| Rhizobiaceae            |                       |  |  |  |  |  |  |
| Rhodobacterales         |                       |  |  |  |  |  |  |
| Rhodobacteraceae        |                       |  |  |  |  |  |  |
| Rhodospirillales        |                       |  |  |  |  |  |  |
| Acetobacteraceae        |                       |  |  |  |  |  |  |
| <i>Acetobacter</i>      |                       |  |  |  |  |  |  |
| <i>Asaia</i>            |                       |  |  |  |  |  |  |
| <i>Commensalibacter</i> |                       |  |  |  |  |  |  |
| <i>C. intestini</i>     |                       |  |  |  |  |  |  |
| <i>Gluconobacter</i>    |                       |  |  |  |  |  |  |
| <i>Saccharibacter</i>   |                       |  |  |  |  |  |  |
| <i>S. floricola</i>     |                       |  |  |  |  |  |  |
| Rhodospirillaceae       |                       |  |  |  |  |  |  |
| Rickettsiales           |                       |  |  |  |  |  |  |
| Anaplasmataceae         |                       |  |  |  |  |  |  |
| <i>Wolbachia</i>        |                       |  |  |  |  |  |  |



|                 |                        |  |  |  |  |  |
|-----------------|------------------------|--|--|--|--|--|
|                 | <i>Chrysobothris</i>   |  |  |  |  |  |
|                 | <i>C. femorata</i>     |  |  |  |  |  |
| Carabidae       |                        |  |  |  |  |  |
|                 | <i>Carabus</i>         |  |  |  |  |  |
| Cerambycidae    |                        |  |  |  |  |  |
|                 | <i>Monochamus</i>      |  |  |  |  |  |
|                 | <i>Nortia</i>          |  |  |  |  |  |
|                 | <i>N. carinicollis</i> |  |  |  |  |  |
|                 | <i>Phaea</i>           |  |  |  |  |  |
| Chrysomelidae   |                        |  |  |  |  |  |
|                 | <i>Diabrotica</i>      |  |  |  |  |  |
|                 | <i>D. cristata</i>     |  |  |  |  |  |
|                 | <i>Monoleptites</i>    |  |  |  |  |  |
| Curculionidae   |                        |  |  |  |  |  |
|                 | <i>Cryptorhynchus</i>  |  |  |  |  |  |
|                 | <i>C. lapathi</i>      |  |  |  |  |  |
|                 | <i>Euplatypus</i>      |  |  |  |  |  |
|                 | <i>E. parallelus</i>   |  |  |  |  |  |
|                 | <i>Hylobius</i>        |  |  |  |  |  |
|                 | <i>Porthetes</i>       |  |  |  |  |  |
|                 | <i>Sampsonius</i>      |  |  |  |  |  |
|                 | <i>S. dampfi</i>       |  |  |  |  |  |
|                 | <i>Trigonopterus</i>   |  |  |  |  |  |
| Elateridae      |                        |  |  |  |  |  |
|                 | <i>Conoderus</i>       |  |  |  |  |  |
|                 | <i>C. lividus</i>      |  |  |  |  |  |
|                 | <i>Melanotus</i>       |  |  |  |  |  |
| Lampyridae      |                        |  |  |  |  |  |
| Melyridae       |                        |  |  |  |  |  |
|                 | <i>Collops</i>         |  |  |  |  |  |
| Staphylinidae   |                        |  |  |  |  |  |
|                 | <i>Atheta</i>          |  |  |  |  |  |
| Tenebrionidae   |                        |  |  |  |  |  |
| Collembola      |                        |  |  |  |  |  |
| Hypogastruridae |                        |  |  |  |  |  |
|                 | <i>Ceratophysella</i>  |  |  |  |  |  |
| Decapoda        |                        |  |  |  |  |  |
|                 | Ocypodidae             |  |  |  |  |  |
|                 | <i>Uca</i>             |  |  |  |  |  |
| Diptera         |                        |  |  |  |  |  |
|                 | Cecidomyiidae          |  |  |  |  |  |
|                 | Ceratopogonidae        |  |  |  |  |  |
|                 | <i>Culicoides</i>      |  |  |  |  |  |

|                        |  |  |  |  |  |
|------------------------|--|--|--|--|--|
| Chironomidae           |  |  |  |  |  |
| <i>Acricotopus</i>     |  |  |  |  |  |
| <i>A. lucens</i>       |  |  |  |  |  |
| <i>Orthocladius</i>    |  |  |  |  |  |
| <i>O. doreus</i>       |  |  |  |  |  |
| <i>Polypedilum</i>     |  |  |  |  |  |
| Dolichopodidae         |  |  |  |  |  |
| <i>Dolichopus</i>      |  |  |  |  |  |
| Drosophilidae          |  |  |  |  |  |
| <i>Drosophila</i>      |  |  |  |  |  |
| <i>D. grimshawi</i>    |  |  |  |  |  |
| Phoridae               |  |  |  |  |  |
| <i>Megaselia</i>       |  |  |  |  |  |
| <i>M. scalaris</i>     |  |  |  |  |  |
| Psychodidae            |  |  |  |  |  |
| <i>Berdeniella</i>     |  |  |  |  |  |
| <i>Phlebotomus</i>     |  |  |  |  |  |
| <i>P. perniciosus</i>  |  |  |  |  |  |
| Sarcophagidae          |  |  |  |  |  |
| <i>Parasarcophaga</i>  |  |  |  |  |  |
| <i>Sarcophaga</i>      |  |  |  |  |  |
| <i>S. taenionota</i>   |  |  |  |  |  |
| Simuliidae             |  |  |  |  |  |
| Stratiomyidae          |  |  |  |  |  |
| <i>Hermetia</i>        |  |  |  |  |  |
| <i>H. illucens</i>     |  |  |  |  |  |
| Syrphidae              |  |  |  |  |  |
| <i>Toxomerus</i>       |  |  |  |  |  |
| Tabanidae              |  |  |  |  |  |
| <i>Chrysops</i>        |  |  |  |  |  |
| <i>Haematopota</i>     |  |  |  |  |  |
| <i>H. pluvialis</i>    |  |  |  |  |  |
| <i>Hybomitra</i>       |  |  |  |  |  |
| <i>H. rhombica</i>     |  |  |  |  |  |
| Tachinidae             |  |  |  |  |  |
| <i>Zelia</i>           |  |  |  |  |  |
| <i>Z. vertebrata</i>   |  |  |  |  |  |
| Xylophagidae           |  |  |  |  |  |
| <i>Exeretonevra</i>    |  |  |  |  |  |
| <i>E. angustifrons</i> |  |  |  |  |  |
| Hemiptera              |  |  |  |  |  |
| Aleyrodidae            |  |  |  |  |  |
| Cicadellidae           |  |  |  |  |  |



|               |                         |  |  |  |  |  |
|---------------|-------------------------|--|--|--|--|--|
|               | <i>Cicadella</i>        |  |  |  |  |  |
|               | <i>C. viridis</i>       |  |  |  |  |  |
|               | <i>Deltocephalus</i>    |  |  |  |  |  |
| Delphacidae   |                         |  |  |  |  |  |
|               | <i>Nilaparvata</i>      |  |  |  |  |  |
|               | <i>N. lugens</i>        |  |  |  |  |  |
| Flatidae      |                         |  |  |  |  |  |
| Issidae       |                         |  |  |  |  |  |
|               | <i>Eusarima</i>         |  |  |  |  |  |
|               | <i>Gelastystrella</i>   |  |  |  |  |  |
|               | <i>G. litaoensis</i>    |  |  |  |  |  |
| Miridae       |                         |  |  |  |  |  |
|               | <i>Phytocoris</i>       |  |  |  |  |  |
| Triozidae     |                         |  |  |  |  |  |
|               | <i>Trioza</i>           |  |  |  |  |  |
| Hymenoptera   |                         |  |  |  |  |  |
| Apidae        |                         |  |  |  |  |  |
|               | <i>Diadasia</i>         |  |  |  |  |  |
|               | <i>D. bituberculata</i> |  |  |  |  |  |
|               | <i>Paratetrapedia</i>   |  |  |  |  |  |
| Braconidae    |                         |  |  |  |  |  |
|               | <i>Ecphyllus</i>        |  |  |  |  |  |
| Chrysididae   |                         |  |  |  |  |  |
|               | <i>Chrysis</i>          |  |  |  |  |  |
| Crabronidae   |                         |  |  |  |  |  |
|               | <i>Trypoxylon</i>       |  |  |  |  |  |
|               | <i>T. figulus</i>       |  |  |  |  |  |
| Diapriidae    |                         |  |  |  |  |  |
| Formicidae    |                         |  |  |  |  |  |
|               | <i>Anochetus</i>        |  |  |  |  |  |
|               | <i>Camponotus</i>       |  |  |  |  |  |
|               | <i>Cyphomyrmex</i>      |  |  |  |  |  |
|               | <i>Pachycondyla</i>     |  |  |  |  |  |
|               | <i>P. javana</i>        |  |  |  |  |  |
|               | <i>Pseudomyrmex</i>     |  |  |  |  |  |
|               | <i>P. salvini</i>       |  |  |  |  |  |
|               | <i>P. satanicus</i>     |  |  |  |  |  |
| Halictidae    |                         |  |  |  |  |  |
|               | <i>Lasioglossum</i>     |  |  |  |  |  |
| Ichneumonidae |                         |  |  |  |  |  |
|               | <i>Pimpla</i>           |  |  |  |  |  |
|               | <i>P. molesta</i>       |  |  |  |  |  |
| Mymaridae     |                         |  |  |  |  |  |

|                           |  |  |  |  |  |
|---------------------------|--|--|--|--|--|
| Pompilidae                |  |  |  |  |  |
| <i>Aporus</i>             |  |  |  |  |  |
| <i>A. niger</i>           |  |  |  |  |  |
| Scelionidae               |  |  |  |  |  |
| <i>Baeus</i>              |  |  |  |  |  |
| <i>Macroteleia</i>        |  |  |  |  |  |
| Vespidae                  |  |  |  |  |  |
| <i>Agelaia</i>            |  |  |  |  |  |
| <i>Apoica</i>             |  |  |  |  |  |
| <i>A. thoracica</i>       |  |  |  |  |  |
| <i>Mischocyttarus</i>     |  |  |  |  |  |
| <i>M. mexicanus</i>       |  |  |  |  |  |
| <i>Polybia</i>            |  |  |  |  |  |
| <i>Protopolybia</i>       |  |  |  |  |  |
| <i>Synoeca</i>            |  |  |  |  |  |
| <i>S. septentrionalis</i> |  |  |  |  |  |
| Lepidoptera               |  |  |  |  |  |
| Crambidae                 |  |  |  |  |  |
| <i>Chilo</i>              |  |  |  |  |  |
| <i>C. suppressalis</i>    |  |  |  |  |  |
| Elachistidae              |  |  |  |  |  |
| <i>Antaeotricha</i>       |  |  |  |  |  |
| Epipyropidae              |  |  |  |  |  |
| <i>Heteropsyche</i>       |  |  |  |  |  |
| Hesperiidae               |  |  |  |  |  |
| <i>Parphorus</i>          |  |  |  |  |  |
| <i>P. decora</i>          |  |  |  |  |  |
| Noctuidae                 |  |  |  |  |  |
| <i>Spodoptera</i>         |  |  |  |  |  |
| <i>S. exigua</i>          |  |  |  |  |  |
| Riodinidae                |  |  |  |  |  |
| <i>Detritivora</i>        |  |  |  |  |  |
| Megaloptera               |  |  |  |  |  |
| Mesostigmata              |  |  |  |  |  |
| Neuroptera                |  |  |  |  |  |
| Chrysopidae               |  |  |  |  |  |
| Orthoptera                |  |  |  |  |  |
| Gryllidae                 |  |  |  |  |  |
| <i>Agnotecous</i>         |  |  |  |  |  |
| Tettigoniidae             |  |  |  |  |  |
| Psocoptera                |  |  |  |  |  |
| Pachytroctidae            |  |  |  |  |  |
| Peripsocidae              |  |  |  |  |  |

|                     |  |  |  |  |  |
|---------------------|--|--|--|--|--|
| Psocidae            |  |  |  |  |  |
| <i>Blastopsocus</i> |  |  |  |  |  |
| <i>B. lithinus</i>  |  |  |  |  |  |
| <i>Longivalvus</i>  |  |  |  |  |  |
| Thysanoptera        |  |  |  |  |  |
| Phlaeothripidae     |  |  |  |  |  |
| <i>Haplothrips</i>  |  |  |  |  |  |
| Thripidae           |  |  |  |  |  |
| <i>Scirtothrips</i> |  |  |  |  |  |
| <i>S. bounites</i>  |  |  |  |  |  |
| <i>S. citri</i>     |  |  |  |  |  |
| Trombidiformes      |  |  |  |  |  |
| Lebertiidae         |  |  |  |  |  |
| <i>Lebertia</i>     |  |  |  |  |  |
| Foraminifera        |  |  |  |  |  |
| Fungi               |  |  |  |  |  |
| Eurotiales          |  |  |  |  |  |
| Trichocomaceae      |  |  |  |  |  |
| Wallemiales         |  |  |  |  |  |
| Wallemiaceae        |  |  |  |  |  |
| <i>Wallemia</i>     |  |  |  |  |  |
| <i>W. sebi</i>      |  |  |  |  |  |
| Nematoda            |  |  |  |  |  |
| Tylenchida          |  |  |  |  |  |
| Viridiplantae       |  |  |  |  |  |
| Caryophyllales      |  |  |  |  |  |
| Amaranthaceae       |  |  |  |  |  |
| <i>Beta</i>         |  |  |  |  |  |

**Supplementary Table 2.** Summary of taxonomic data recovered from one Malaise trap sample using three different data sources. Important taxonomic recoveries have been highlighted. Full taxonomic details are in Supplementary Table 1.

| Data Source       | Prokaryotes                                                    | Plants & Fungi                                     | Non-Arthropods                | Arthropoda                               |                                          |                                          |                                        |                                                                                                                                           |
|-------------------|----------------------------------------------------------------|----------------------------------------------------|-------------------------------|------------------------------------------|------------------------------------------|------------------------------------------|----------------------------------------|-------------------------------------------------------------------------------------------------------------------------------------------|
|                   |                                                                |                                                    |                               | Coleoptera                               | Diptera                                  | Hymenoptera                              | Lepidoptera                            | Other Orders                                                                                                                              |
| <b>Morphology</b> | None                                                           | None                                               | None                          | Present                                  | Present                                  | Present                                  | Present                                | Araneae, Blattodea, Collembola, Hemiptera, Neuroptera, Orthoptera, Psocoptera, Thysanoptera, Trichoptera, Trombidiformes                  |
| <b>Sanger COI</b> | None                                                           | None                                               | None                          | 7 families, 8 genera, 4 species          | 8 families, 2 genera                     | 10 families, 12 genera, 5 species        | 2 families, 2 genera                   | Araneae, Blattodea, Collembola, Hemiptera, Neuroptera, Psocoptera, Thysanoptera, Trombidiformes                                           |
| <b>NGS COI</b>    | <i>Rickettsia, Wolbachia</i>                                   | None                                               | None                          | <b>12 families, 17 genera, 7 species</b> | <b>13 families, 14 genera, 7 species</b> | <b>12 families, 20 genera, 9 species</b> | <b>5 families, 4 genera, 1 species</b> | <b>Araneae, Blattodea, Collembola, Decapoda, Hemiptera, Megaloptera, Neuroptera, Orthoptera, Psocoptera, Thysanoptera, Trombidiformes</b> |
| <b>NGS 16S</b>    | <b>14 phyla, 37 orders, 67 families, 70 genera, 43 species</b> | <b>Amaranthaceae, Trichocomaceae, Wallemiaceae</b> | <b>Annelida, Foraminifera</b> | 2 families, 1 genus                      | Chironomidae, Phoridae                   | 3 families, 2 genera                     | 1 species                              | Hemiptera                                                                                                                                 |
| <b>NGS 18S</b>    | 2 phyla, 2 orders, 2 families, 1 genus, 1 species              | Present                                            | <b>Apicomplexa, Nematoda</b>  | Present                                  | 6 families, 4 genera, 4 species          | 4 families, 1 genera, 1 species          | 1 species                              | Blattodea, Collembola, Hemiptera, Mesostigmata, Orthoptera, Psocoptera, Thysanoptera, Trombidiformes                                      |

**Supplementary Table 3.** Number of sequences and family-level diversity represented in COI primer design, including amplification primers designed.

| <b>Order</b>               | <b>#sequences</b> | <b>#families</b> | <b>Primer set</b>             |
|----------------------------|-------------------|------------------|-------------------------------|
| Araneae                    | 14639             | 68               | ArF5 X ArR6                   |
| Blattodea (incl. Isoptera) | 854               | 11               | ArF4 X ArR6<br>or ArF3 X ArR7 |
| Coleoptera                 | 15632             | 80               | ArF1 X ArR2                   |
| "Collembola"               | 5437              | 16               | ArF5 X ArR6                   |
| Dermaptera                 | 47                | 1                | ArF5 X ArR6                   |
| Diptera                    | 44778             | 62               | ArF1 X ArR3                   |
| Ephemeroptera              | 5924              | 15               | ArF2 X ArR5                   |
| Hemiptera                  | 8703              | 60               | ArF10 X ArR3                  |
| Hymenoptera                | 2000              | 36               | ArF10 X ArR5                  |
| Isopoda                    | 1840              | 28               | ArF2 X ArR5                   |
| Lepidoptera                | 3000              | 39               | ArF1 X ArR6                   |
| Mantodea                   | 169               | 12               | ArF2 X ArR5                   |
| Mecoptera                  | 51                | 4                | ArF1 X ArR6                   |
| Megaloptera                | 417               | 2                | ArF2 X ArR5                   |
| Neuroptera                 | 682               | 18               | ArF1 X ArR3                   |
| Odonata                    | 1691              | 14               | ArF1 X ArR5                   |
| Orthoptera                 | 2464              | 14               | ArF1 X ArR5                   |
| Phasmida                   | 78                | 2                | ArF1 X ArR5                   |
| Plecoptera                 | 2578              | 11               | ArF1 X ArR5                   |
| Psocoptera                 | 82                | 2                | ArF5 X ArR9                   |
| Thysanoptera               | 879               | 4                | ArF5 X ArR9                   |
| Trichoptera                | 14502             | 43               | ArF5 X ArR9                   |
| Trombidiformes             | 1822              | 17               | ArF10 X ArR5                  |
| <b>Total</b>               | <b>128269</b>     | <b>559</b>       |                               |

**Primers**

ArF1 GCI CCW GAY ATR GCI TTY CCI CG  
ArF2 GCI CCI GAY ATR GCI TTY CCI CG  
ArF3 GCI CCR GAY ATR GCI TTY CCA CG  
ArF4 GCI CCC GAT ATR GCI TTY CCY CG  
ArF5 GCI CCI GAY ATR KCI TTY CCI CG  
ArF10 CCW GAT ATA KCI TWY CCI CG  
ArR2 CCW GTW YTI GCI GGI GCI ATY AC  
ArR3 CCW GTW YTA GCI GGI GCW ATY AC  
ArR5 CCI GTI YTI GCI GGI GCI ATY AC  
ArR6 CCI GTI TTR GCI GGI GCI ATY AC  
ArR7 CCI GTI YTI GCI GGR GCA ATY AC  
ArR9 CCW GTI YTW GCI GGI GCI ATY AC
